# Supplementary material for: Hypoxia-Induced Adaptations of miRNomes and Proteomes in Melanoma Cells and Their Secreted Extracellular Vesicles
Source: PubMed Central journal article supplement (PMC7140034; doi:10.3390/cancers12030692), 2020-03-14
Supplement: cancers-12-00692-s001.pdf [file cancers-12-00692-s001.pdf]

# Figure S1

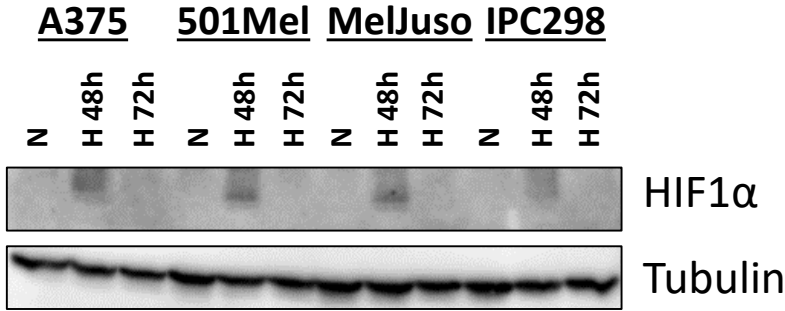

Figure S1. Expression analysis of HIF1α in 4 melanoma cell lines exposed to normoxia (N) or hypoxia (H) (1% O<sub>2</sub> for 48h or 72h) by Western blot.

# Figure S2

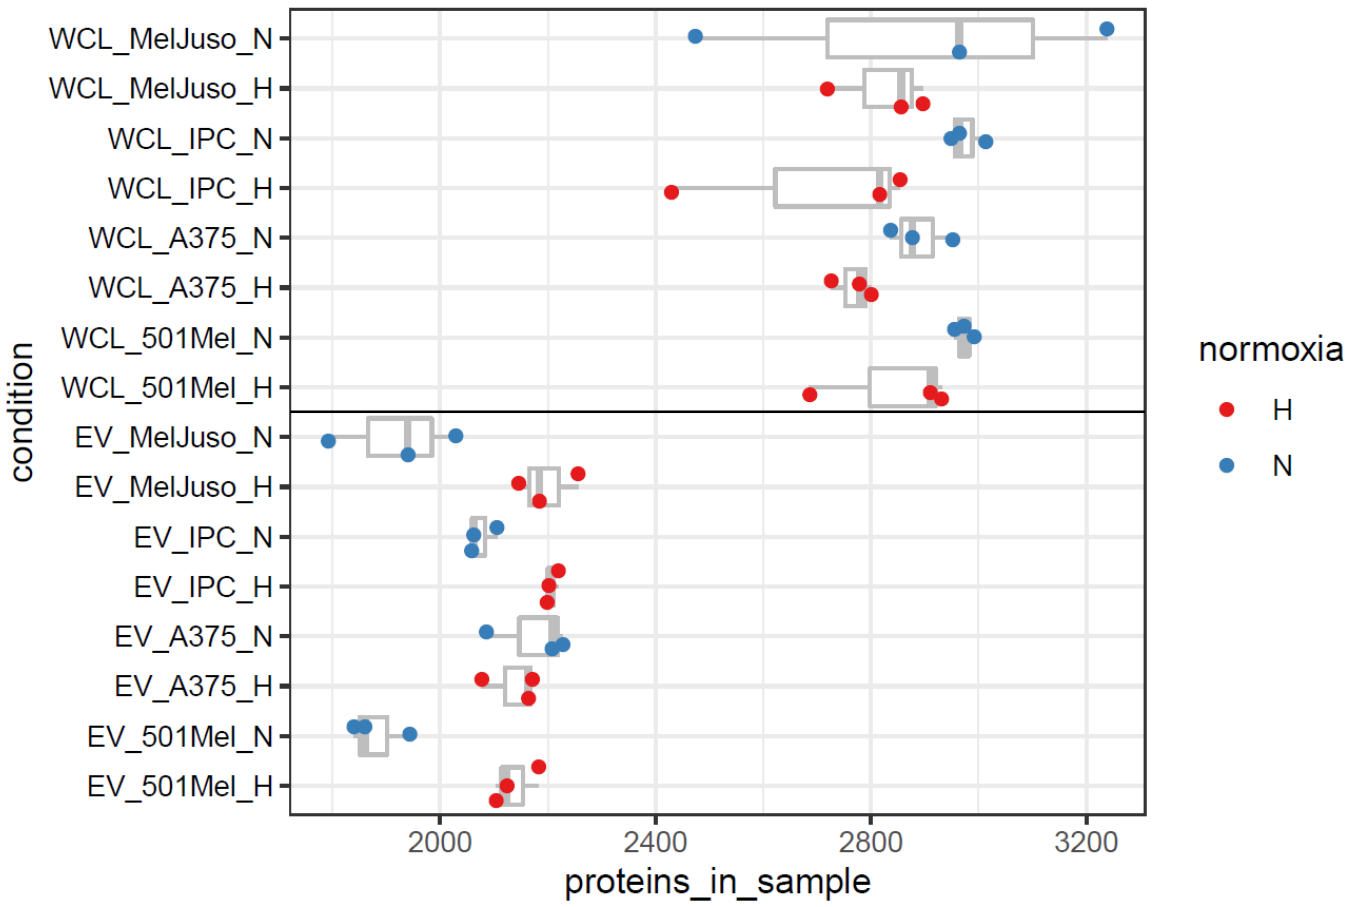

Figure S2. Number of proteins identified by mass spectrometry in WCL samples or EV samples of four melanoma cell lines (A375, 501Mel, MelJuso and IPC298). N: normoxia, H: hypoxia.

# Figure S3

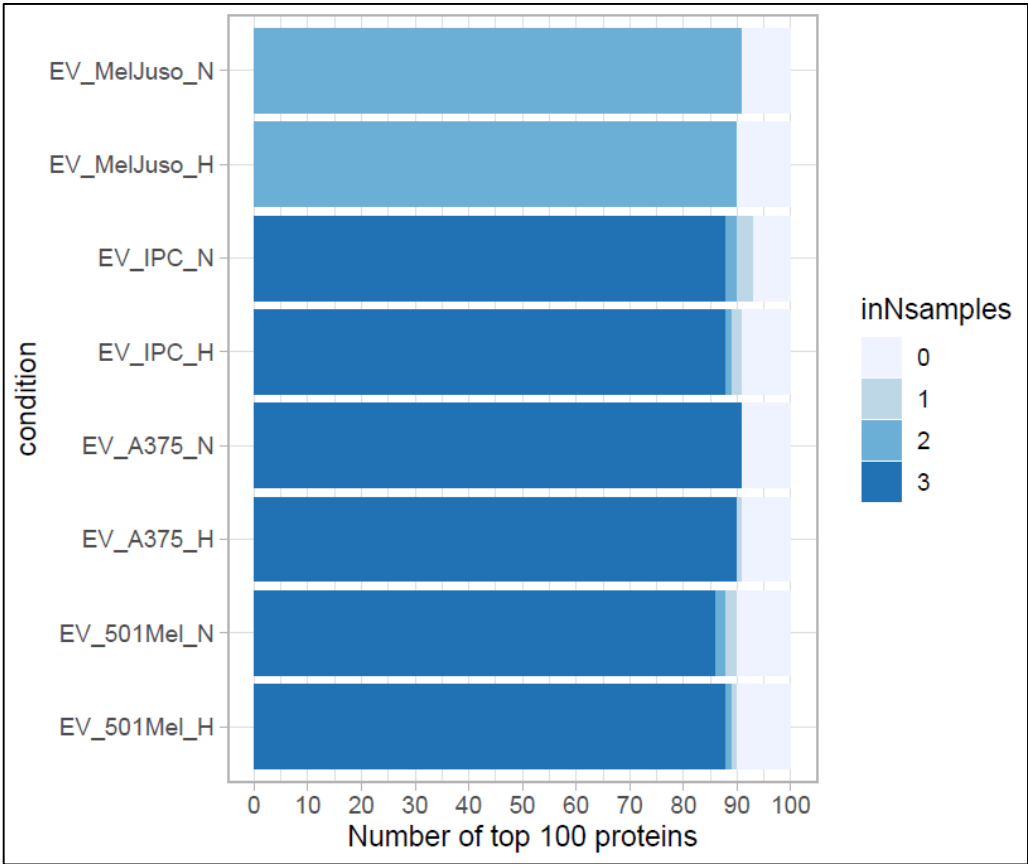

Figure S3. Graph depicting the number of proteins in EV samples, matching the top 100 proteins commonly identified in exosomes (Exocarta). Three biological replicates per melanoma cell line except for MelJuso (2 biological replicates).

Figure S4

A

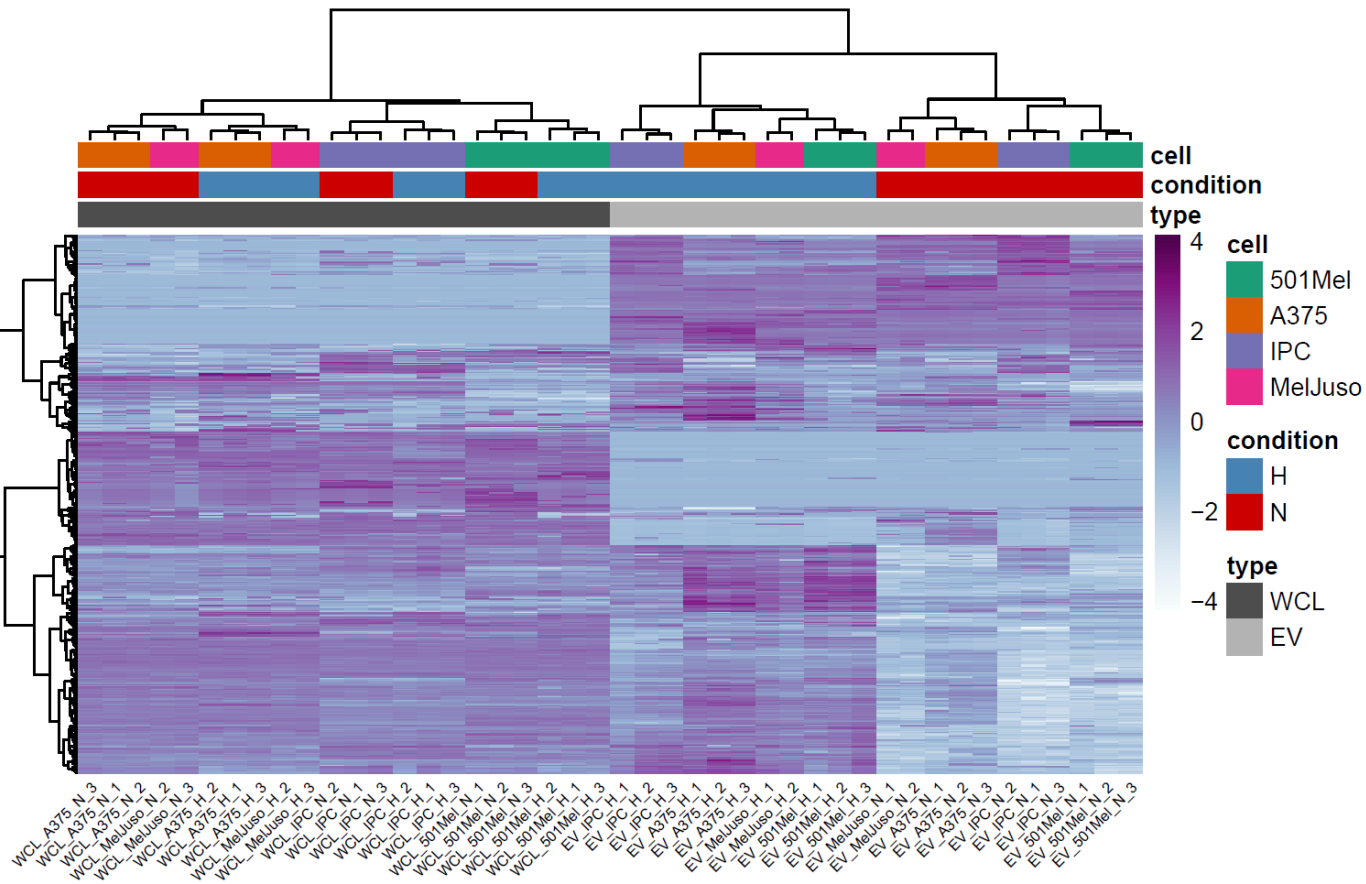

B

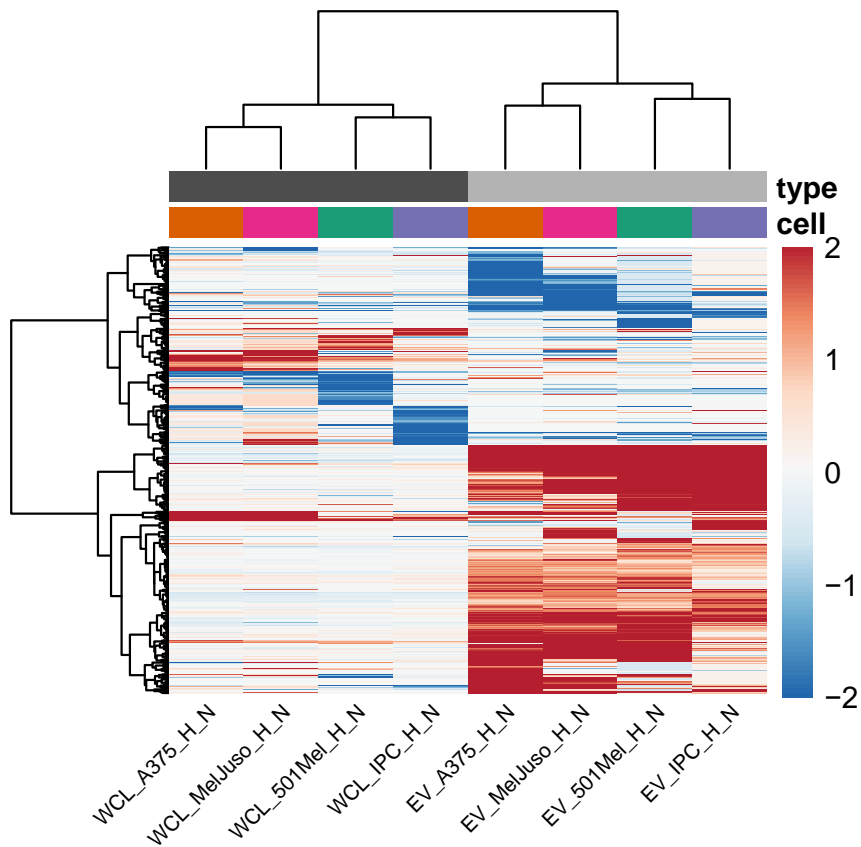

Figure S4. (A) Heatmap showing all the identified proteins in hEVs and nEVs or hypoxic and normoxic WCLs of the 4 melanoma cell lines, without hierarchical clustering and (B) heatmap showing fold changes of all differentially expressed proteins upon hypoxia. Color indicates fold change.

**Figure S5**

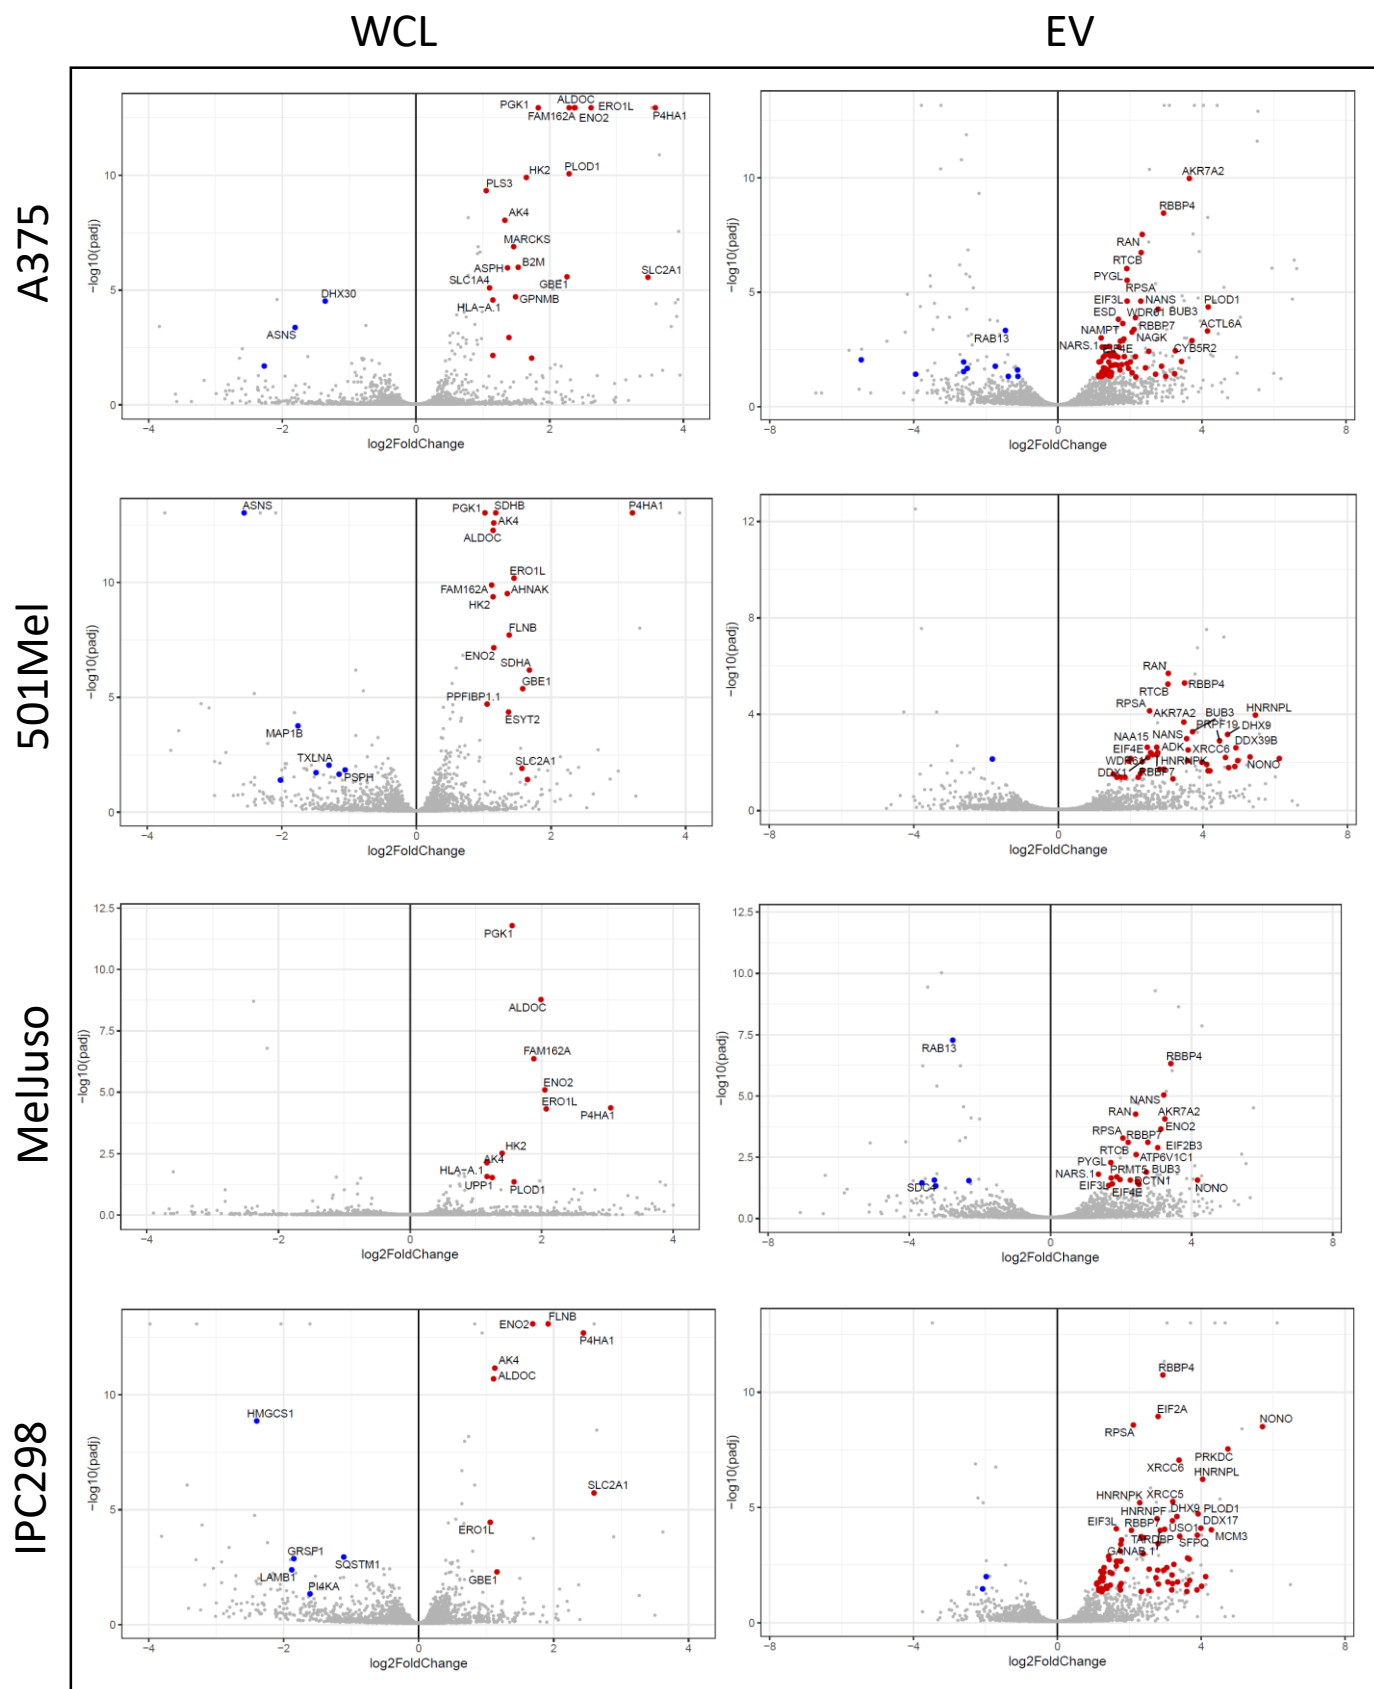

Figure S5. Volcano plots showing the differentially expressed proteins in hEVs and nEVs or hypoxic and normoxic WCLs of the 4 melanoma cell lines.

# Figure S6

A

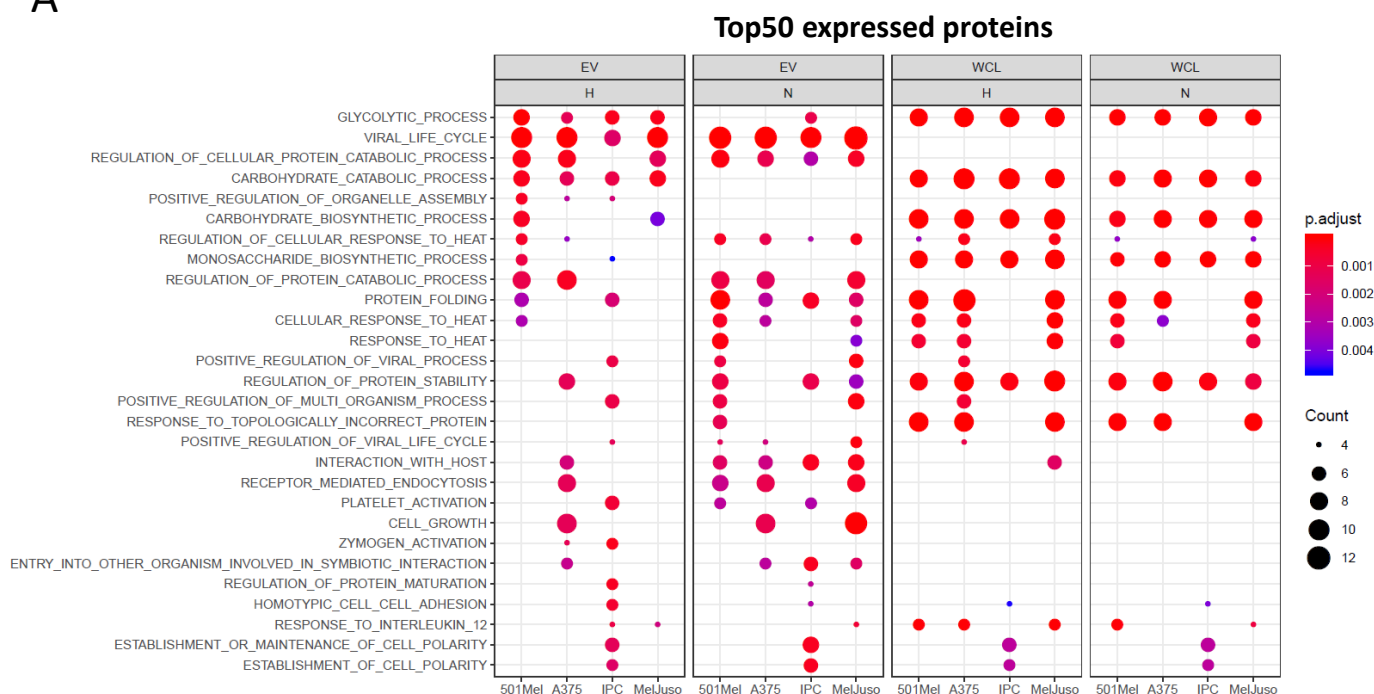

B

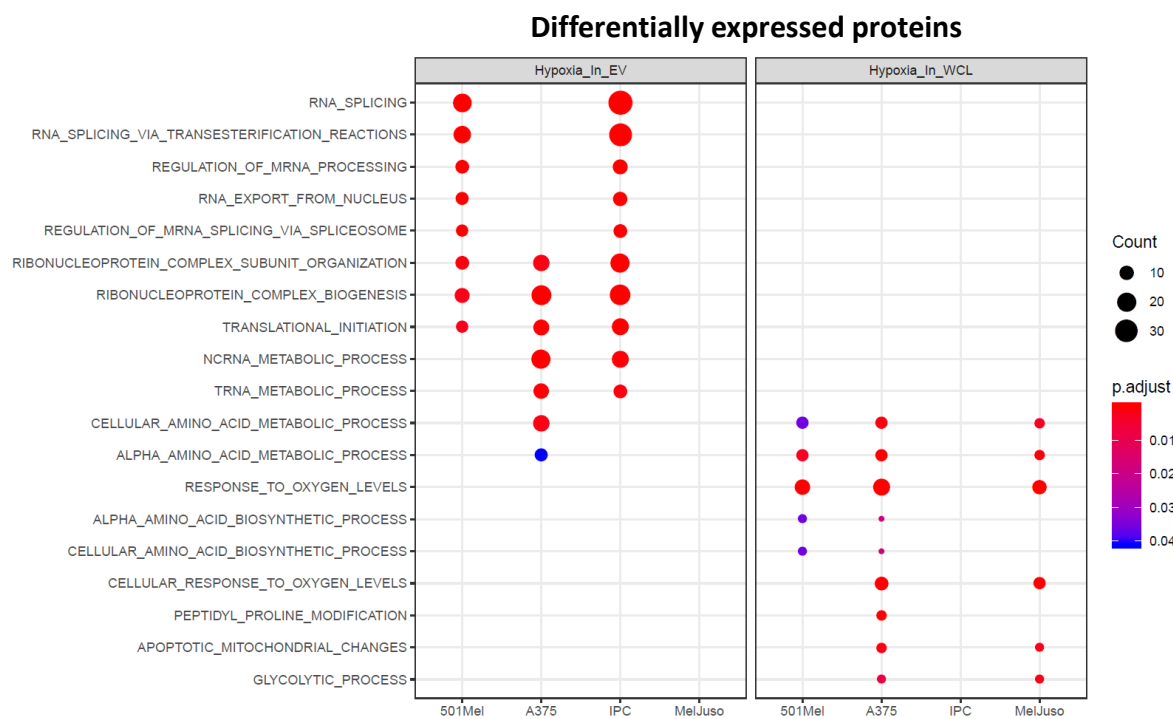

Figure S6. (A) Graph representing the Gene Ontology “Biological Processes” enriched among the 50 top expressed proteins in nEVs, hEVs, normoxic or hypoxic WCLs, the top 5 significant categories in each condition are shown. (B) Graph representing the Gene Ontology “Biological Processes” enriched among only the differentially expressed proteins in nEVs, hEVs, normoxic or hypoxic WCLs, the top 5 significant categories in each condition are shown. Count is the number of genes identified per GO biological process for the indicated compartment. Color shows the adjusted p-value.

Figure S7

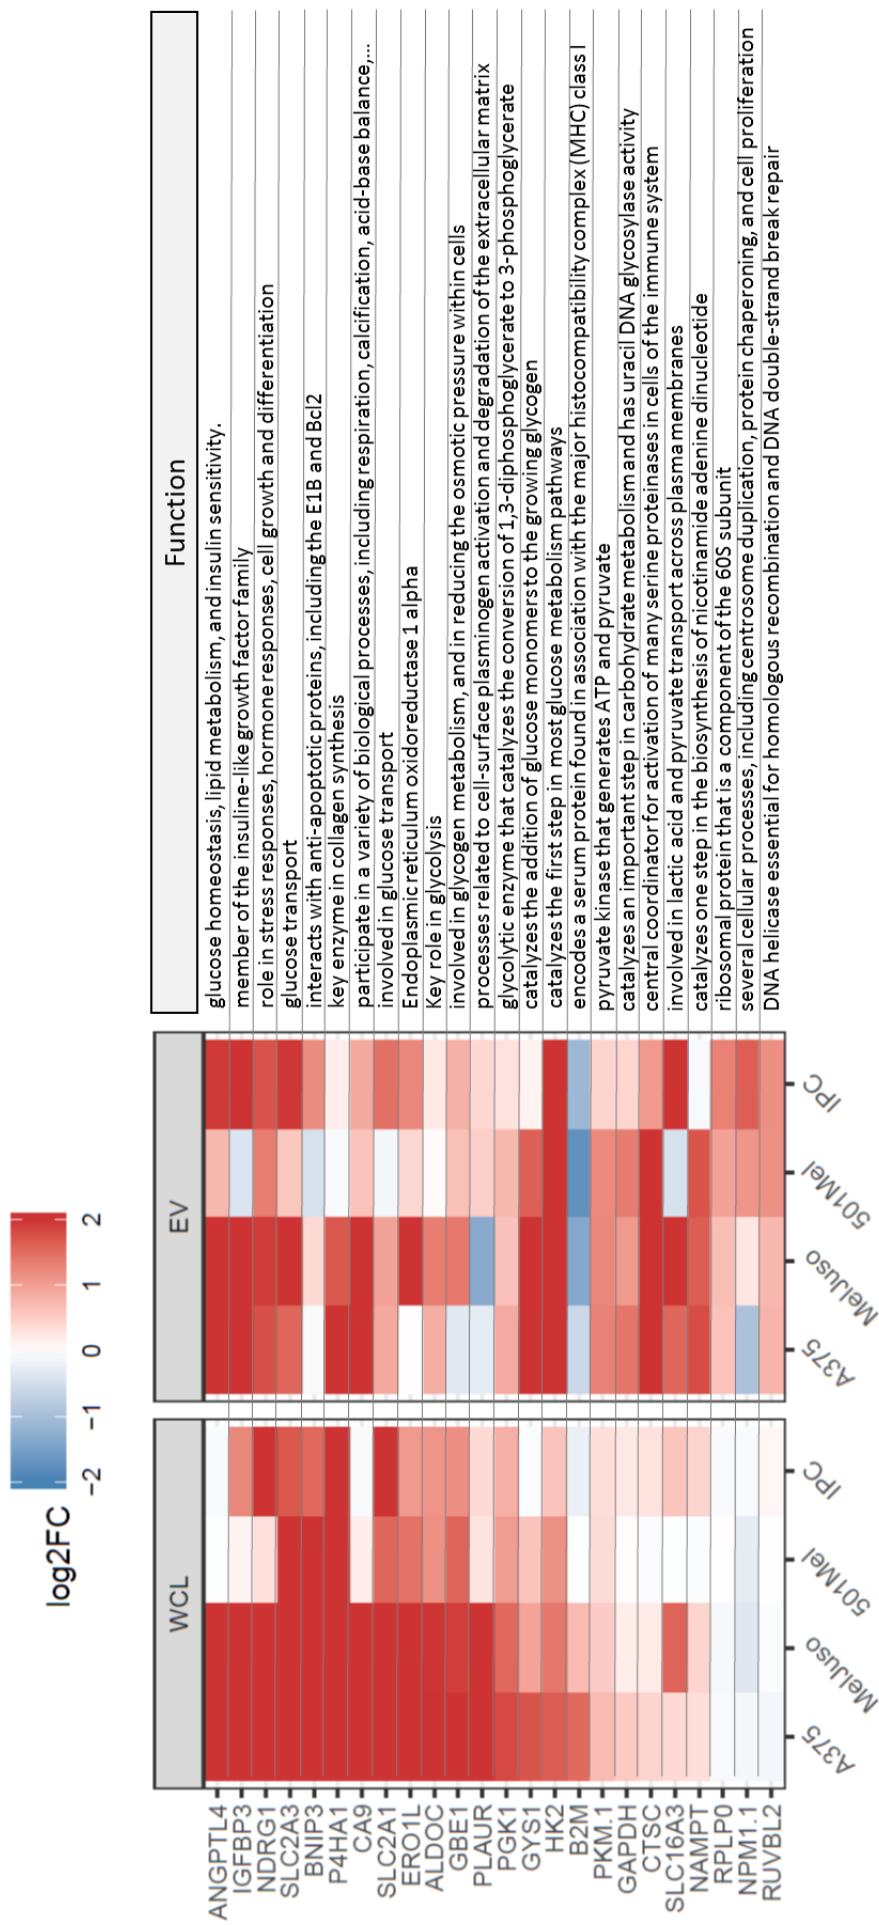

Figure S7. Expression of hypoxia signature proteins in WCL and exosomes of 4 melanoma cell lines (A375, MelJuso, IPC298, 501Mel). Colors show the foldchange in expression relative to normoxia (log<sub>2</sub> scale). Proteins are arbitrarily sorted by their expression level in 501Mel WCLs. The function of each gene is summarized on a table adjoining the heatmap (<https://www.ncbi.nlm.nih.gov/gene/>).

## Figure S8

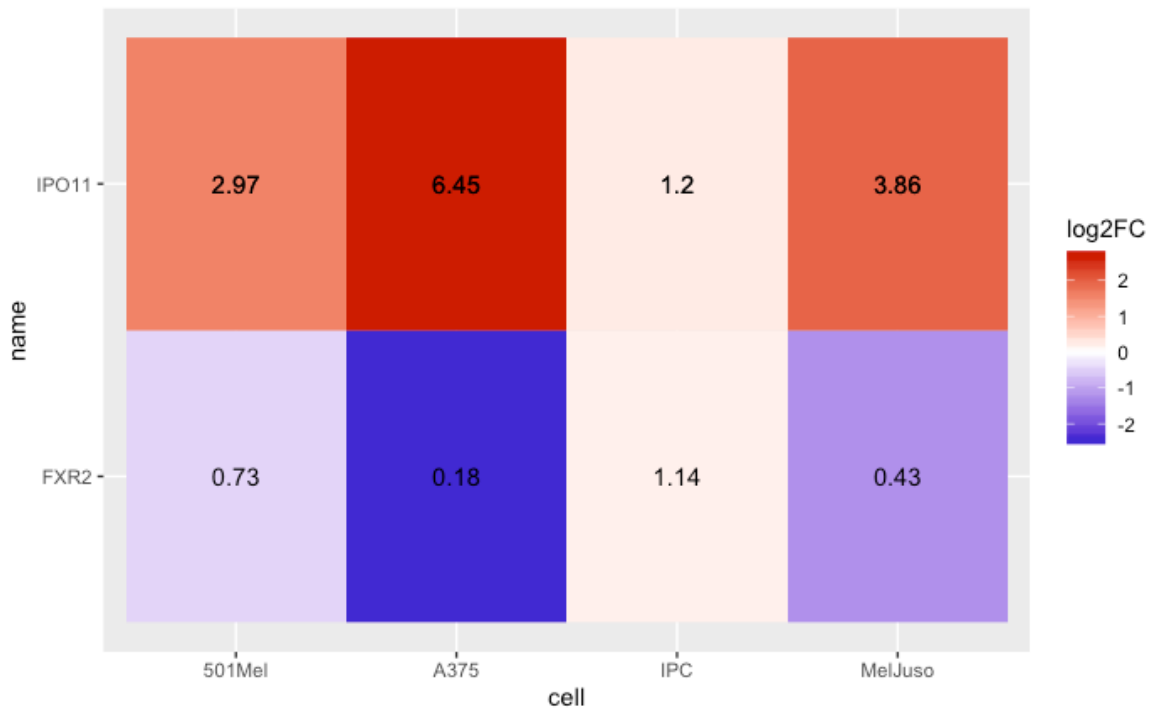

Figure S8. Heatmap showing the differentially expressed proteins (based on MS data) in hEVs compared to nEVs, which are predicted targets of miR-1290 (FXR2) or of miR-23a-5p/miR-23b-5p (IPO11). Numbers indicates the changes in expression relative to normoxia and colors show the foldchange in expression relative to normoxia (log2 scale).



# Figure S9

**A**

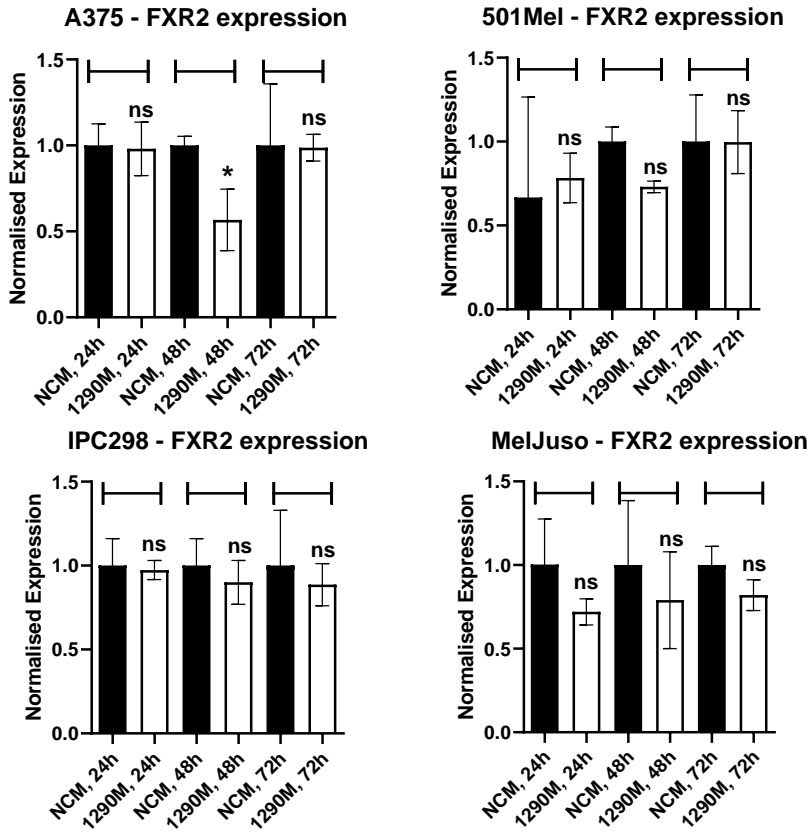

**B**

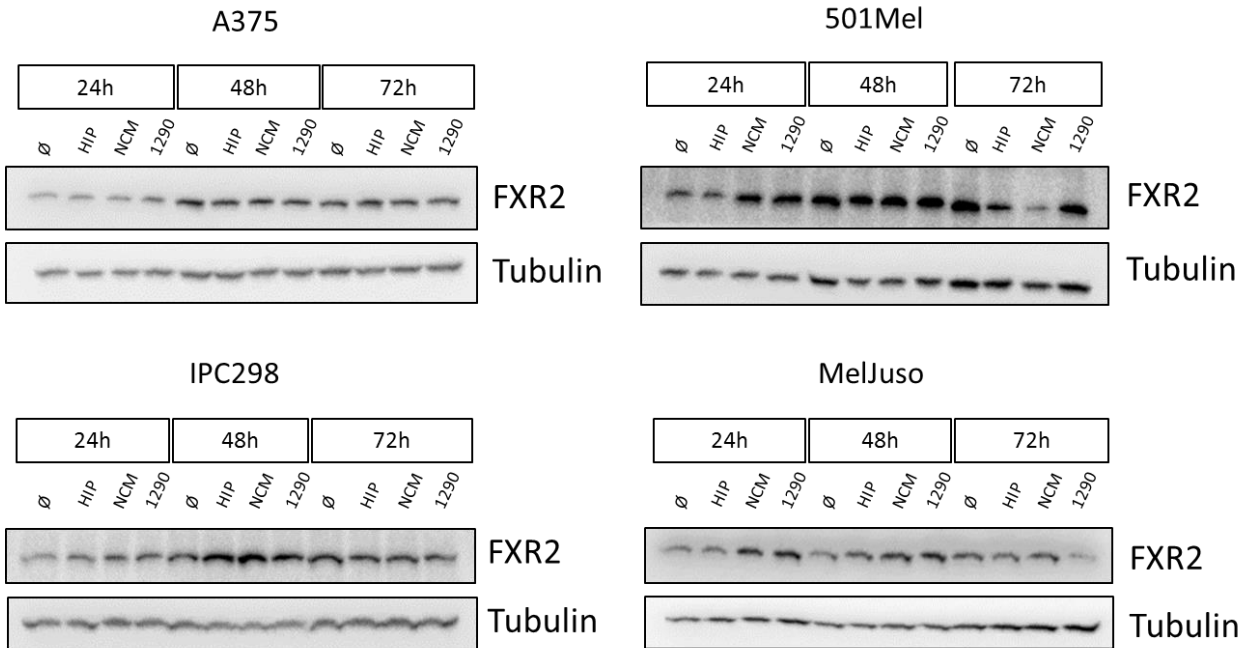

**Figure S9**

**C**

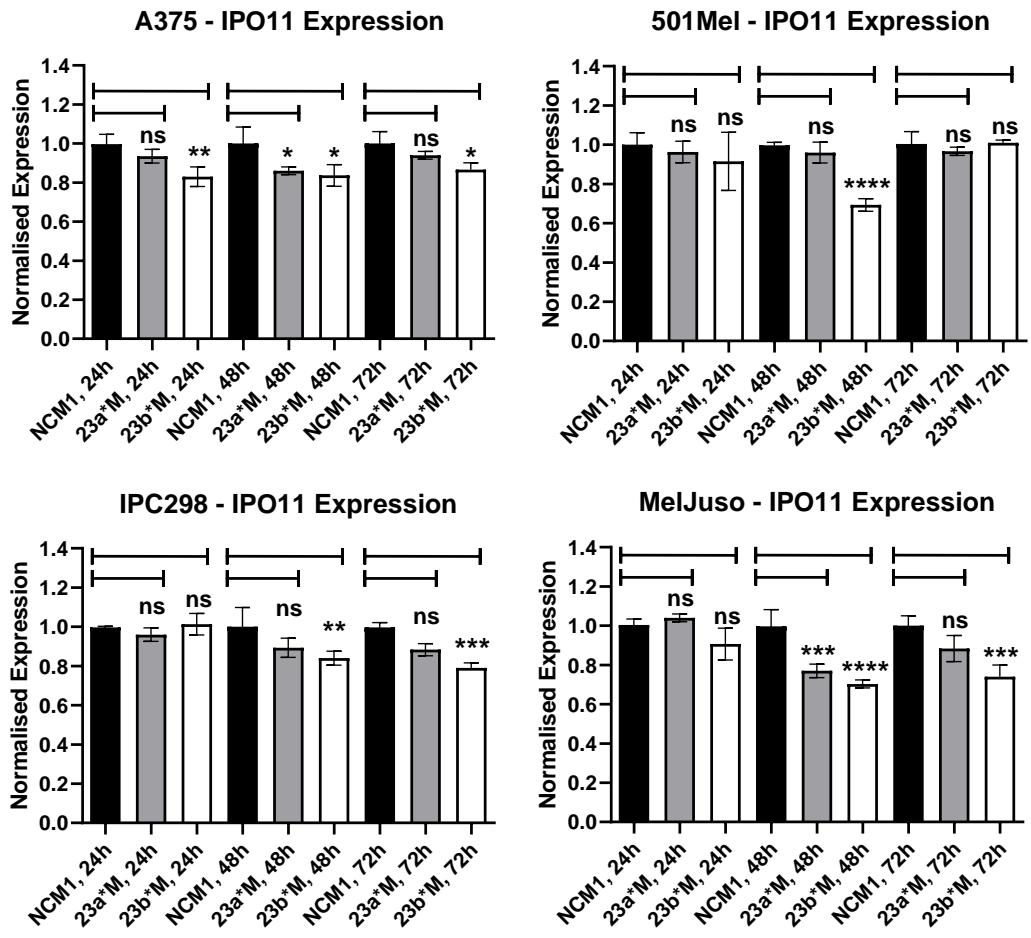

**D**

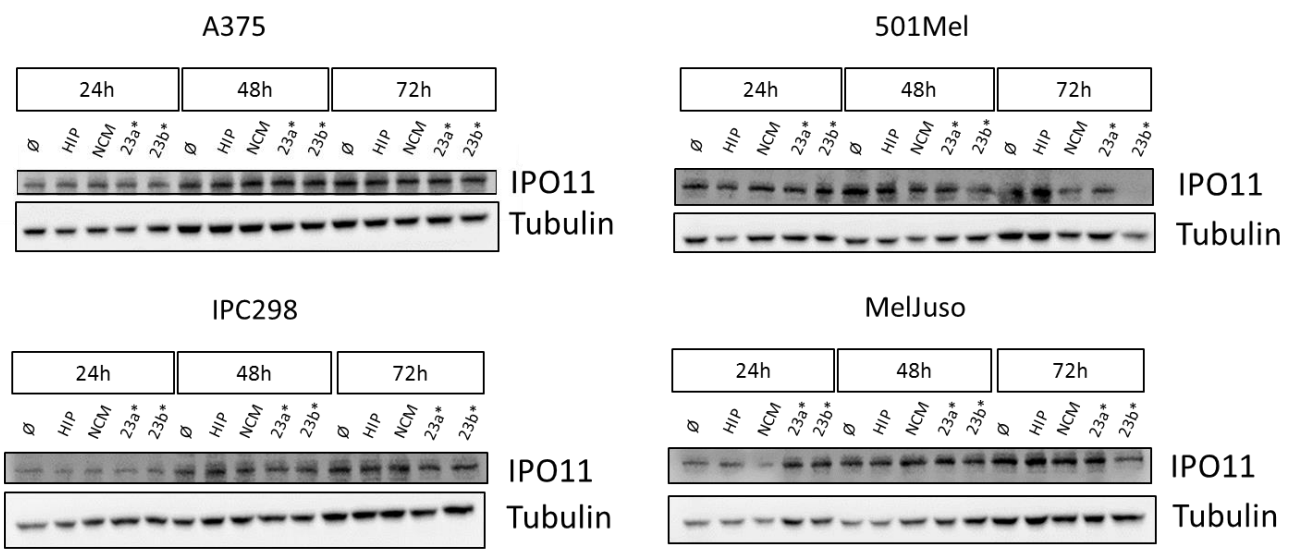

## Figure S9

Figure S9. Expression analysis of mRNA and protein levels of FXR2 and IPO11 in melanoma cells transfected with either miR-1290, miR-23a-5p (miR-23a\*) or miR-23b-5p (miR-23b\*) mimics. (A) Normalized expression levels of FXR2 mRNA in 4 melanoma cell lines transfected with miR-1290 mimic or negative control mimic (NCM) at 24, 48 or 72h after transfection. (B) Expression analysis of FXR2 protein level in non-transfected cells ( $\emptyset$ ), cells transfected with HiPerfect transfection reagent (HIP) only or cells transfected with miR-1290 mimic or negative control mimic (NCM) at 24, 48 or 72h after transfection by Western blot. (C) Normalized expression levels of IPO11 mRNA in 4 melanoma cell lines transfected with either miR-23a\* or miR-23b\* mimic or negative control mimic (NCM) at 24, 48 or 72h after transfection. (D) Expression analysis of IPO11 protein levels in non-transfected cells ( $\emptyset$ ), cells transfected with HiPerfect transfection reagent (HIP) only or transfected with either miR-23a\* or miR-23b\* mimic or negative control mimic (NCM) at 24, 48 or 72h after transfection by Western blot. \*:p < 0.05, \*\*:p < 0.01, \*\*\*:p < 0.001, compared to NCM treatment for each time-point. Statistical analysis was performed using one-way ANOVA coupled with Dunnett's multiple comparison test.

# Figure S10

A

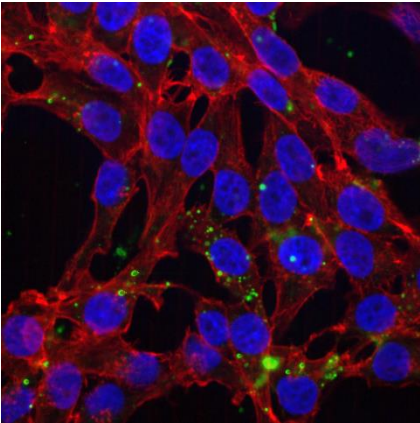

A375 normoxia + nEV A375

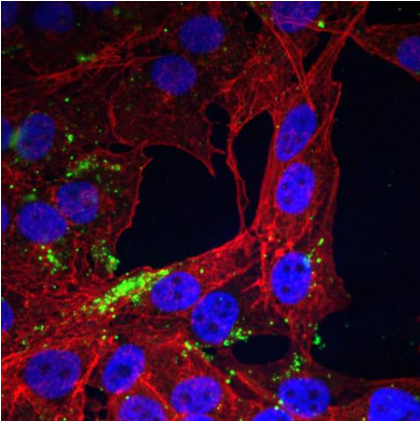

A375 hypoxia + nEV A375

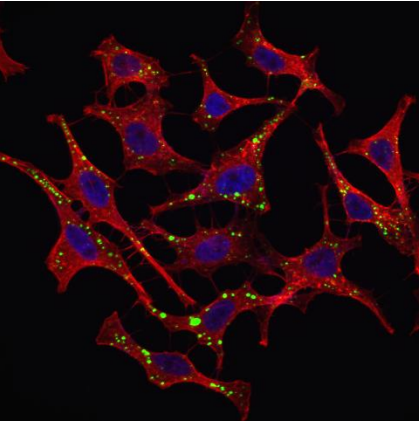

501Mel normoxia + nEV 501Mel

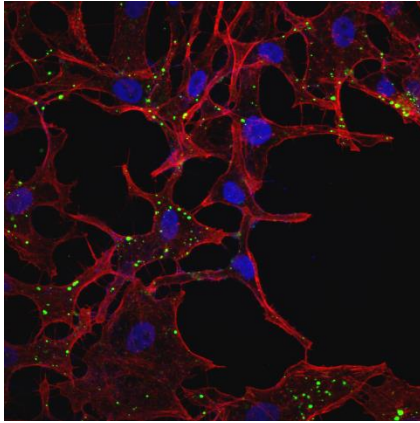

501Mel hypoxia + nEV 501Mel

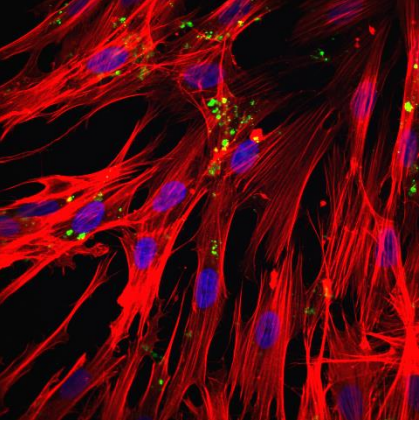

NHDF normoxia + nEV A375

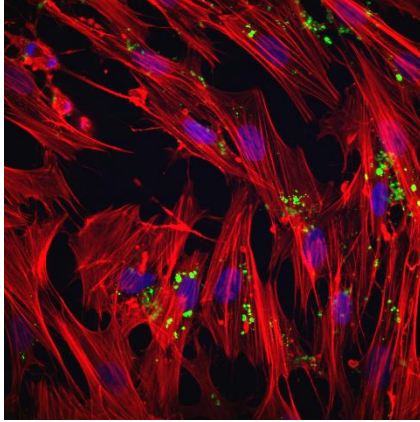

NHDF hypoxia + nEV 501Mel

# Figure S10

B

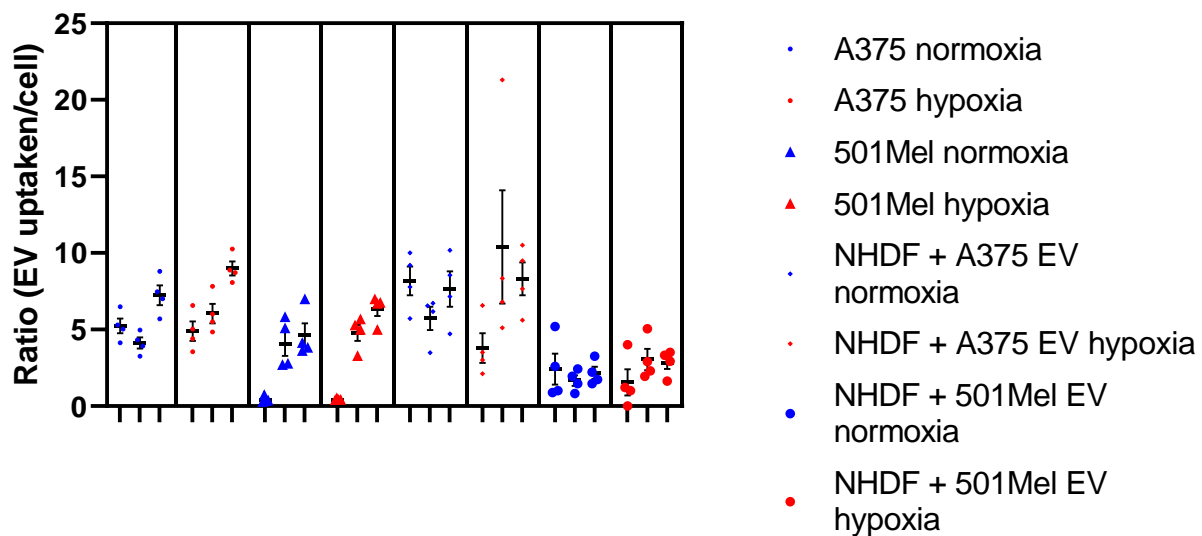

Figure S10. EV uptake assay. (A) Confocal microscopy of A375, 501Mel and NHDF cells, under normoxia or hypoxia, after 16h incubation with A375 and/or 501Mel nEV labelled with PKH67. (B) Ratio of EVs uptaken/cell for all co-culture experiments as described in (A). Spots were counted using an automatic counting software on Cytation5 pictures.

# Table S1

Table S1. Differentially expressed proteins in hEVs in at least 2 melanoma cell lines, which were imputed less than three times. Log rank p values for survival risk difference between high and low expression of the indicated gene. Significant differences for patient survival for the proteins upregulated in hEVs are p-values  $\leq 0.055$  which are marked in red.

| Protein       | p-value       | adjusted.p | Protein name                                                      |
|---------------|---------------|------------|-------------------------------------------------------------------|
| ACTL6A        | 0.6858        | 0.8992     | Actin-like protein 6A                                             |
| ADK           | 0.2598        | 0.6335     | Adenosine kinase                                                  |
| <b>AKR7A2</b> | <b>0.0421</b> | 0.3380     | Aflatoxin B1 aldehyde reductase member 2                          |
| ARCN1         | 0.1366        | 0.5373     | Coatomer subunit delta                                            |
| AURKB         | 0.0630        | 0.3380     | Aurora kinase B                                                   |
| BUB3          | 0.3948        | 0.6755     | Mitotic checkpoint protein BUB3                                   |
| CBR1          | 0.8194        | 0.9114     | Carbonyl reductase [NADPH] 1                                      |
| COPA          | 0.9205        | 0.9698     | Coatomer subunit alpha;Xenin;Proxenin                             |
| COPB1         | 0.0012        | 0.0765     | Coatomer subunit beta                                             |
| COPB2         | 0.1199        | 0.5053     | Coatomer subunit beta                                             |
| DDX1          | 0.1685        | 0.5408     | ATP-dependent RNA helicase DDX1                                   |
| DDX17         | 0.1808        | 0.5408     | Probable ATP-dependent RNA helicase DDX17                         |
| <b>DDX39B</b> | <b>0.0554</b> | 0.3380     | Spliceosome RNA helicase DDX39B                                   |
| DHX9          | 0.6765        | 0.8992     | ATP-dependent RNA helicase A                                      |
| EIF3A         | 0.6117        | 0.8992     | Eukaryotic translation initiation factor 3 subunit A              |
| <b>EIF3C</b>  | <b>0.0548</b> | 0.3380     | Eukaryotic translation initiation factor 3 subunit C              |
| EIF3E         | 0.8292        | 0.9114     | Eukaryotic translation initiation factor 3 subunit E              |
| EIF3F         | 0.9687        | 0.9702     | Eukaryotic translation initiation factor 3 subunit F              |
| EIF3L         | 0.6828        | 0.8992     | Eukaryotic translation initiation factor 3 subunit L              |
| EIF4E         | 0.6118        | 0.8992     | Eukaryotic translation initiation factor 4E                       |
| ENO2          | 0.2948        | 0.6335     | Gamma-enolase;Enolase                                             |
| ESD           | 0.6537        | 0.8992     | S-formylglutathione hydrolase                                     |
| <b>FARSA</b>  | <b>0.0445</b> | 0.3380     | Phenylalanine-tRNA ligase alpha subunit                           |
| FARSB         | 0.8027        | 0.9114     | Phenylalanine-tRNA ligase beta subunit                            |
| FMNL2         | 0.0497        | 0.3380     | Formin-like protein 2                                             |
| GNB2L1        | 0.6204        | 0.8992     | Guanine nucleotide-binding protein subunit beta-2-like 1          |
| HNRNPK        | 0.5817        | 0.8992     | Heterogeneous nuclear ribonucleoprotein K                         |
| HNRNPL        | 0.9667        | 0.9702     | Heterogeneous nuclear ribonucleoprotein L                         |
| ITCH          | 0.07381       | 0.3629     | E3 ubiquitin-protein ligase Itchy homolog                         |
| MCM3          | 0.7612        | 0.9114     | DNA replication licensing factor MCM3                             |
| NAA15         | 0.2761        | 0.6335     | N-alpha-acetyltransferase 15, NatA auxiliary subunit              |
| NAGK          | 0.7243        | 0.9092     | N-acetyl-D-glucosamine kinase                                     |
| NAMPT         | 0.1475        | 0.5408     | Nicotinamide phosphoribosyltransferase                            |
| NANS          | 0.3736        | 0.6755     | Sialic acid synthase                                              |
| NARS.1        | 0.3114        | 0.6335     | Asparagine-tRNA ligase, cytoplasmic                               |
| NMT1          | 0.184         | 0.5408     | Glycylpeptide N-tetradecanoyltransferase 1                        |
| NONO          | 0.174         | 0.5408     | Non-POU domain-containing octamer-binding protein                 |
| PLOD1         | 0.0576        | 0.3380     | Procollagen-lysine,2-oxoglutarate 5-dioxygenase 1                 |
| PRKDC         | 0.1925        | 0.5408     | DNA-dependent protein kinase catalytic subunit                    |
| PRMT1         | 0.4007        | 0.6755     | Protein arginine N-methyltransferase 1                            |
| <b>PRMT5</b>  | <b>0.0490</b> | 0.3380     | Protein arginine N-methyltransferase 5                            |
| PYGL          | 0.9702        | 0.9702     | Glycogen phosphorylase, liver form;Alpha-1,4 glucan phosphorylase |
| QDPR          | 0.2861        | 0.6335     | Dihydropteridine reductase                                        |
| RAB13         | 0.3945        | 0.6755     | Ras-related protein Rab-13                                        |
| RAN           | 0.2464        | 0.6321     | GTP-binding nuclear protein Ran                                   |
| RBBP4         | 0.8342        | 0.9114     | Histone-binding protein RBBP4                                     |
| RBBP7         | 0.1015        | 0.4607     | Histone-binding protein RBBP7                                     |
| RCC2          | 0.3045        | 0.6335     | Protein RCC2                                                      |
| RPSA          | 0.7558        | 0.9114     | 40S ribosomal protein SA                                          |
| RTCB          | not found     |            | tRNA-splicing ligase RtcB homolog                                 |
| SDC4          | 0.0389        | 0.3380     | Syndecan-4                                                        |
| SF3A3         | 0.9112        | 0.9698     | Splicing factor 3A subunit 3                                      |
| SF3B3         | 0.3236        | 0.6364     | Splicing factor 3B subunit 3                                      |
| SND1          | 0.6355        | 0.8992     | Staphylococcal nuclease domain-containing protein 1               |
| UBA1          | 0.5517        | 0.8992     | Ubiquitin-like modifier-activating enzyme 1                       |
| <b>VAR5</b>   | <b>0.0165</b> | 0.3380     | Valine-tRNA ligase                                                |
| VPS45         | 0.2086        | 0.5594     | Vacuolar protein sorting-associated protein 45                    |
| WDR61         | 0.8338        | 0.9114     | WD repeat-containing protein 61                                   |
| XRCC5         | 0.3829        | 0.6755     | X-ray repair cross-complementing protein 5                        |
| XRCC6         | 0.719         | 0.9092     | X-ray repair cross-complementing protein 6                        |



# Western blots information

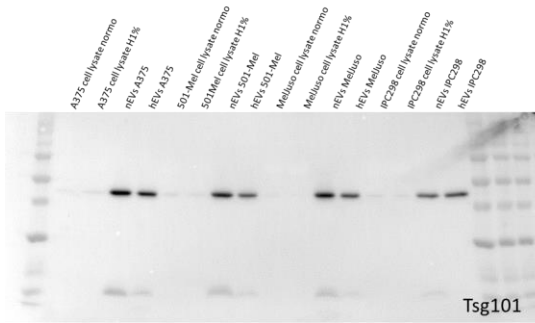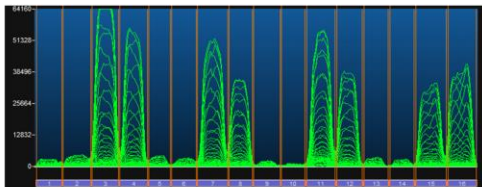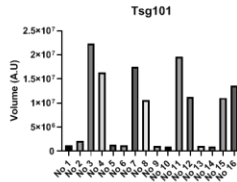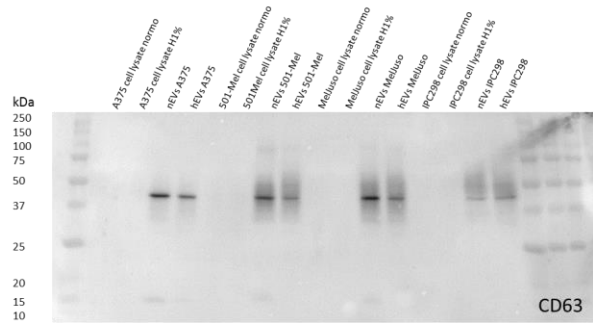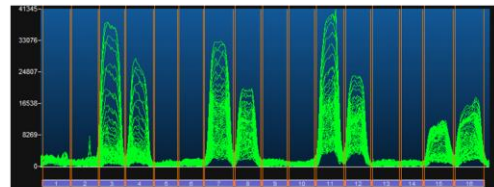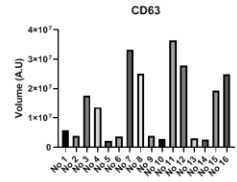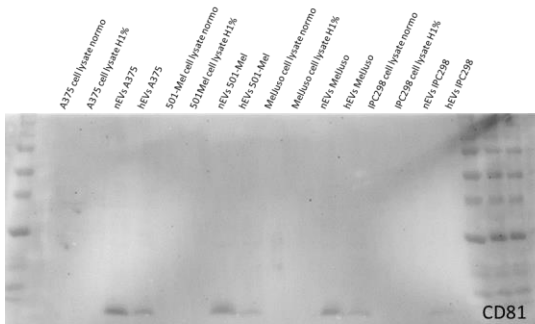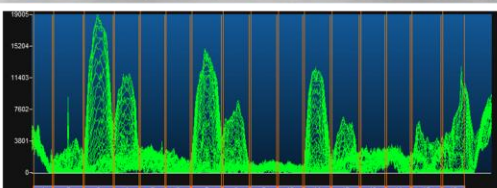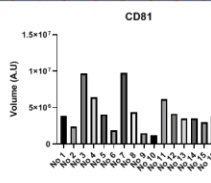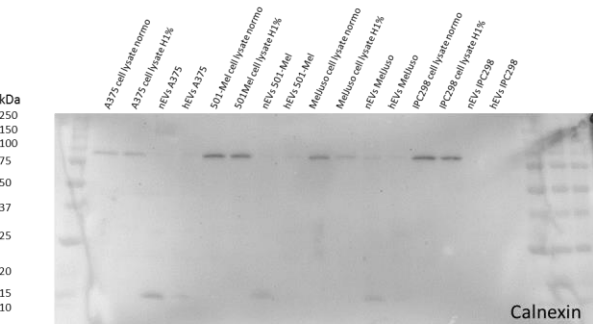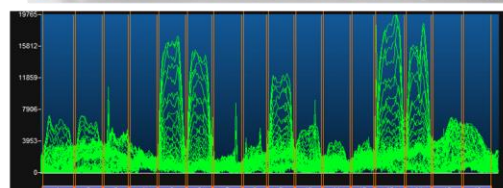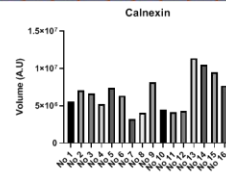

Whole blots and densitometries reading using Vilber Lourmat software of the Western blot Figure 2A.



# Western blots information

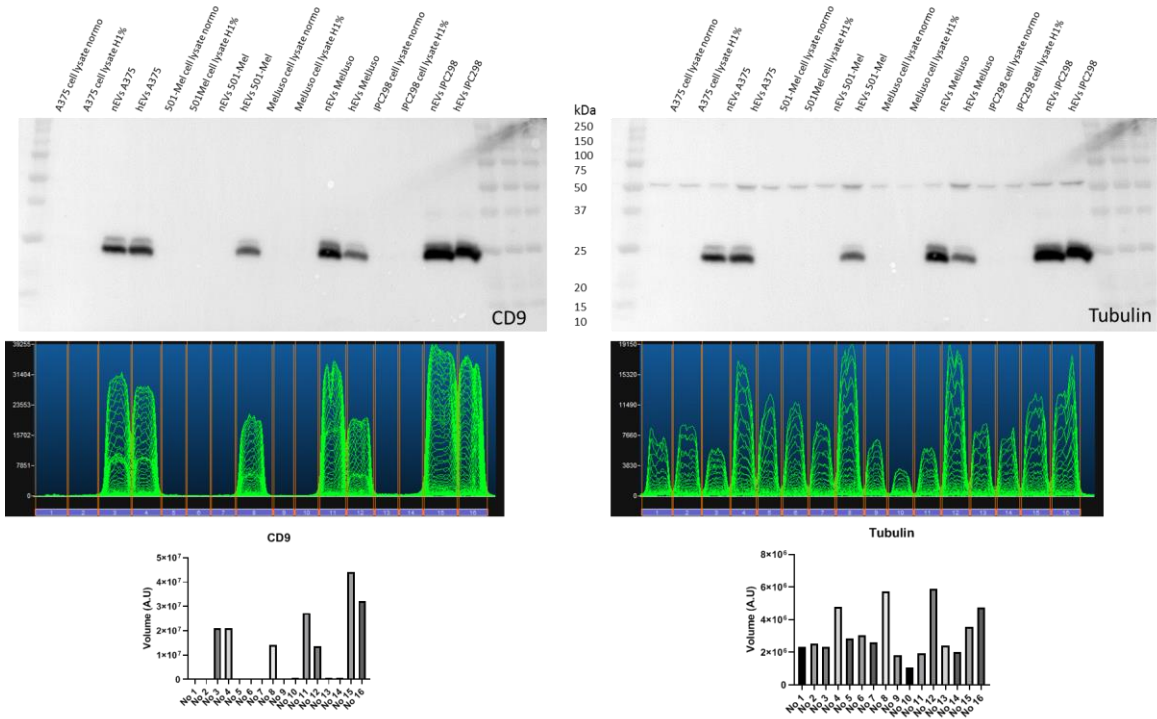

Whole blots and densitometries reading using Vilber Lourmat software of the Western blot Figure 2A.

# Western blots information

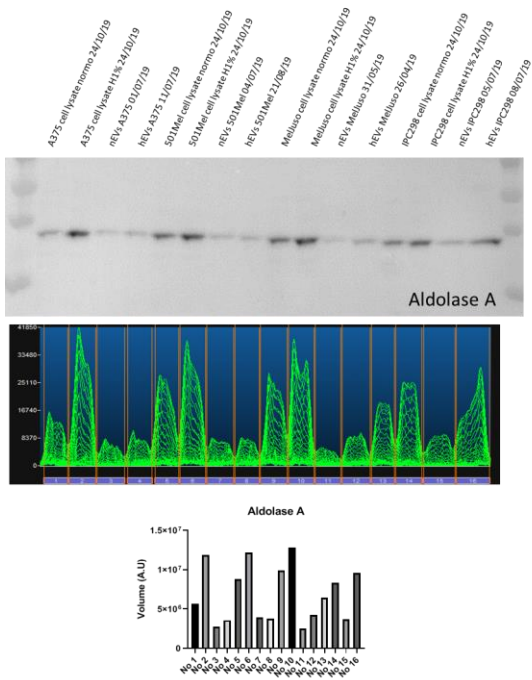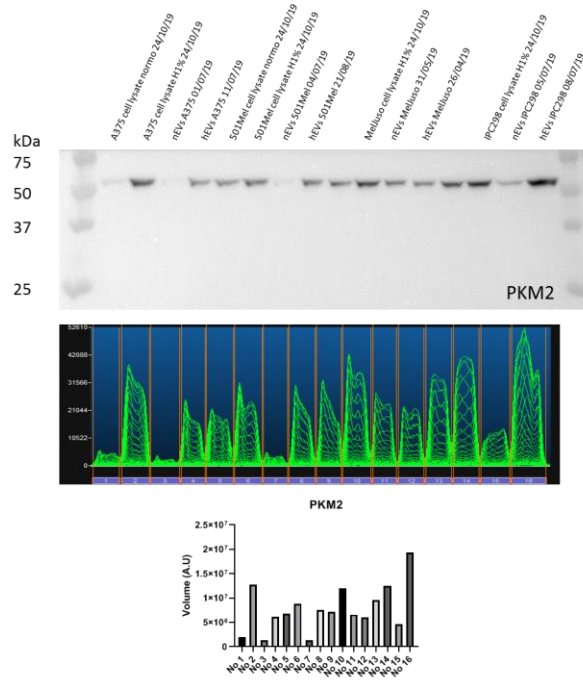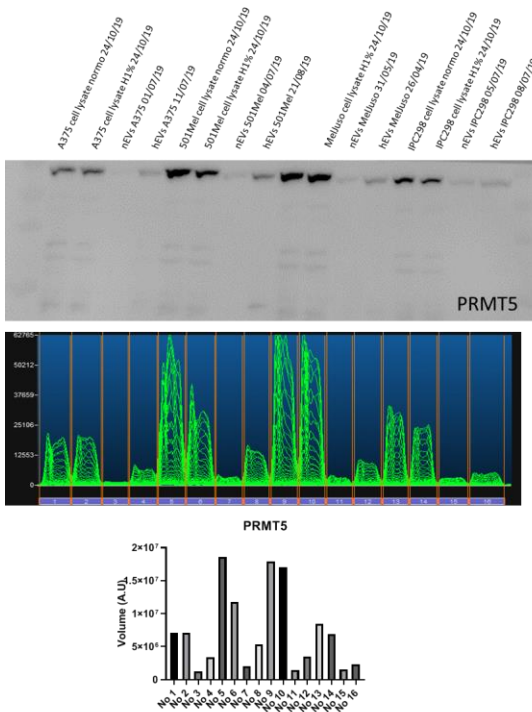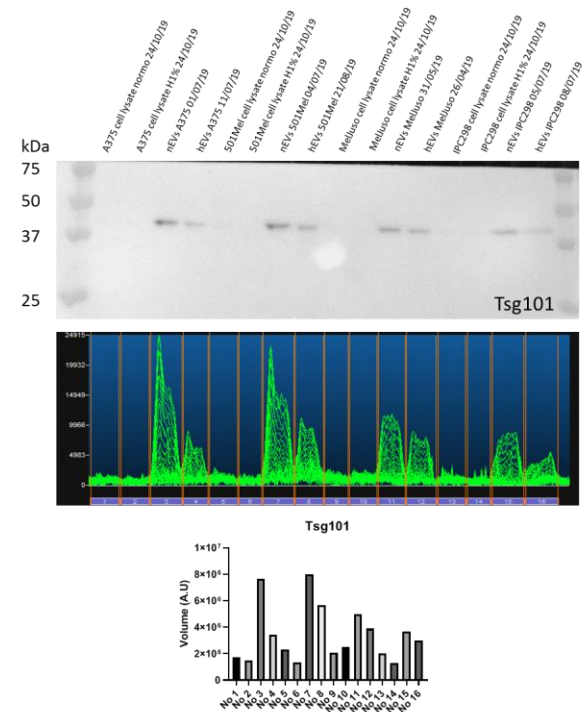

Whole blots and densitometries reading using Vilber Lourmat software of the Western blot Figure 3C.

# Western blots information

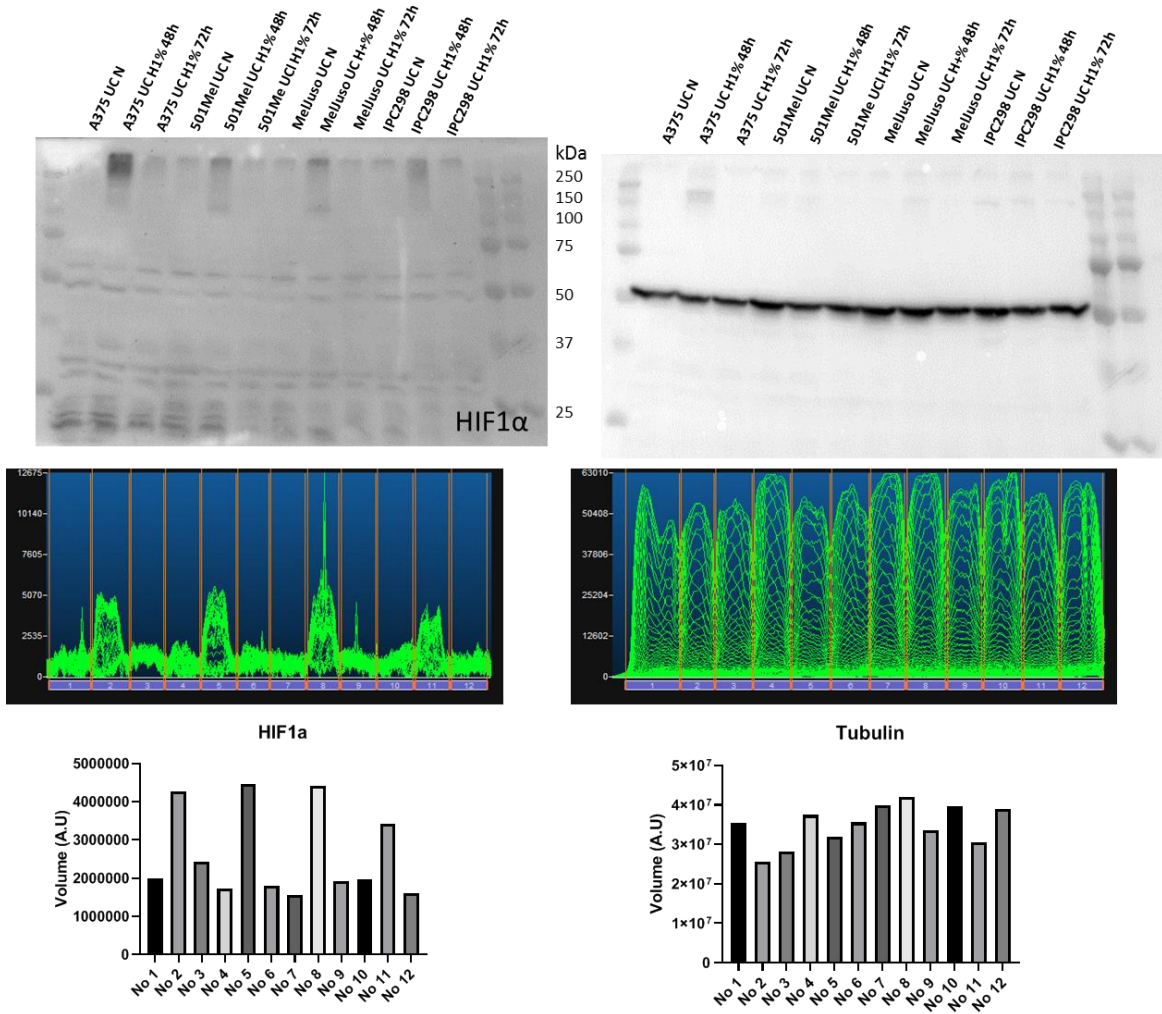

Whole blots and densitometries reading using Vilber Lourmat software of the Western blot Figure S1.
